# Supplementary material
Source: publisher site journal article supplement (https://www.dovepress.com/article/241340)
Supplement: Supplementary file 1 [file get_supplementary_file.php]

## Qualitative Interviews (Patients and Caregivers)

1. Please tell me about your treatment journey with myeloma / lymphoma.
  - a. (Prompt) Do you remember if any particular symptoms made you see the doctor?
  - b. (Probe) How did you feel about the process/experience?
2. Do you have any concerns about your disease or treatment?
  - a. (Probe) Are you able to share these with your physician?
  - b. (Probe) What factors make it easy/difficult to discuss these issues with your physician?
  - c. (Probe) Are there any services which you would have liked to have been made available to you at the start of your journey (e.g. financial counselling, education services, support groups)?
- 3. How did you decide on your treatment plan?**
  - a. (Prompt) What kind of information were you given about your treatment plan?
  - b. (Prompt) Were there other treatment options available to you?
  - c. (Probe) What made you to choose this option over others?
  - d. (Prompt) Is there anything you now feel would have been useful to know or understand before choosing this treatment?
  - e. (Prompt) Did you have the opportunity to discuss your options with anyone prior to making a decision?
  - f. (Probe) Do you feel that you were influenced by anyone or anything when making your decision?
4. How involved would you like to be in your treatment plan?
  - a. (Probe) How involved were you in the plan for this particular treatment?
  - b. (Probe) Was there anything which made it more difficult or easier for you to be involved?
- 5. What would your ideal treatment be?**
  - a. (Prompt): effectiveness, side-effects, cost, route of treatment, site of treatment
  - b. (Probe): Are there certain treatment characteristics which you value more than others? Why?
  - c. (If participant has received treatment before): how has your previous treatment changed your perception of these treatment characteristics?

Thank you for taking part in this interview!

**Bold:** if short for time, please focus on these two questions.

## Qualitative Interviews (Physicians)

1. How do you select treatment options to recommend to your patients?
  - a. (Prompt) What factors do you consider when weighing one treatment option against another?
    - i. (Prompt): effectiveness, side-effects, cost, route of treatment, site of treatment etc.
  - b. Are there certain treatment factors which you value more than others as a physician? Why?
  - c. (Prompt) Do you think there any factors which may be important to patients which do not factor into your decision?
2. Do you offer your patients alternatives to the regimen you have selected?
  - a. (Prompt) Given the breadth of choices available for treatment, how do you think this information be conveyed to patients to avoid overwhelming them with information?
  - b. (Prompt) As a patient, would you want to know all options available to you before proceeding with a treatment plan?
  - c. (Prompt) Do other physicians routinely discuss their planned treatment options with you? Or: do you generally agree with the management of other physicians?

- i. Does your opinion usually differ from theirs?
  - ii. Why or why not?
3. How much control do you think patients should have over the treatment decision?
  - a. (Prompt) What are the barriers to increased patient control?
  - b. (Prompt) Do you feel your patients want control over their treatment decisions?

Thank you for taking part in this interview!
